# Supplementary material for: Macadamia Oil Supplementation Attenuates Inflammation and Adipocyte Hypertrophy in Obese Mice
Source: Hindawi journal article supplement (doi:10.1155/2014/870634), 2014-01-01
Supplement: f1 [file 870634.f1.pdf]

## Supplementary Material

### Supplementary Figures

**Table 1Sup.** Polar and neutral fatty acid composition in gastrocnemius muscle after 12 weeks of treatment.

**Table1Sup.**

| Polar Fatty Acids | CD            | CD + MO      | HF            | HF + MO      |
|-------------------|---------------|--------------|---------------|--------------|
| C16               | 19.39 ± 1.2   | 20.55 ± 2.22 | 20.51 ± 4.03  | 20.76 ± 3.35 |
| C16 n7            | 0.71 ± 0.9    | 0.71 ± 0.29  | 0.76 ± 0.21   | 0.56 ± 0.03  |
| C18:0             | 10.89 ± 2.7   | 11.27 ± 0.23 | 10.89 ± 5.71  | 10.30 ± 3.76 |
| C18:1 n9          | 32.87 ± 9.97  | 31.90 ± 4.9  | 30.73 ± 15.89 | 31.77 ± 7.56 |
| C18:1 n7          | 4.07 ± 0.34   | 3.77 ± 0.27  | 3.22 ± 0.48   | 3.22 ± 0.47  |
| C18 n3            | 0.21 ± 0.08   | 0.23 ± 0.05  | 0.45 ± 0.14   | 0.37 ± 0.13  |
| C20-22 n3         | 7 ± 3.12      | 7.8 ± 0.72   | 8.64 ± 7.32   | 7.84 ± 2.84  |
| C18/20-22 n3      | 0.04 ± 0.04   | 0.03 ± 0.01  | 0.08 ± 0.05   | 0.05 ± 0.01  |
| C18 n6            | 8.01 ± 0.35   | 7.49 ± 3.07  | 11.08 ± 1.98  | 12.27 ± 1.63 |
| C20-22 n6         | 12.26 ± 5.49  | 11.79 ± 2.38 | 9.24 ± 6.88   | 8.28 ± 3.69  |
| C18/20-22 n6      | 0.81 ± 0.52   | 0.62 ± 0.15  | 1.83 ± 1.32   | 1.61 ± 0.46  |
| SFA               | 33.15 ± 2.41  | 34.7 ± 2.62  | 34.11 ± 4.48  | 34.22 ± 0.06 |
| MUFA              | 38.38 ± 10.57 | 37.21 ± 4.84 | 35.53 ± 17    | 36.34 ± 8.1  |
| PUFA              | 28.4 ± 8.15   | 27.97 ± 5.77 | 30.25 ± 14.05 | 29.36 ± 8.12 |
| PUFA n3           | 7.21 ± 3.04   | 8.03 ± 0.69  | 9.09 ± 7.31   | 8.21 ± 2.96  |
| PUFA n6           | 20.26 ± 5.14  | 19.28 ± 5.26 | 20.31 ± 6.7   | 20.55 ± 5.23 |
| n3/n6             | 0.35 ± 0.08   | 0.44 ± 0.11  | 0.4 ± 0.22    | 0.4 ± 0.08   |

| Neutral Fatty Acids | CD           | CD + MO      | HF           | HF + MO      |
|---------------------|--------------|--------------|--------------|--------------|
| C16                 | 23.61 ± 0.77 | 21.60 ± 2.12 | 18.65 ± 0.99 | 20.03 ± 0.61 |
| C16 n7              | 7.96 ± 10.49 | 5.72 ± 7.12  | 0.51 ± 0.01  | 0.51 ± 0.01  |
| C18:0               | 2.56 ± 0.64  | 2.43 ± 0.02  | 3.41 ± 0.41  | 3.03 ± 0.16  |
| C18:1 n9            | 48 ± 5.24    | 49.49 ± 8.47 | 52.65 ± 0.61 | 47.42 ± 4.19 |
| C18:1 n7            | 3.98 ± 0.05  | 4.06 ± 0.62  | 2.99 ± 0.09  | 2.91 ± 0.11  |
| C18 n3              | 0.14 ± 0.12  | 0.32 ± 0.12  | 0.50 ± 0.06  | 0.44 ± 0.24  |
| C20-22 n3           | 0.32 ± 0.13  | 0.26 ± 0.10  | 0.23 ± 0.08  | 1.99 ± 2.50  |
| C18/20-22 n3        | 0.56 ± 0.61  | 1.26 ± 0.03  | 2.30 ± 0.59  | 1.42 ± 1.91  |
| C18 n6              | 7.04 ± 1.37  | 9.46 ± 1.25  | 17.40 ± 0.27 | 13.10 ± 6.37 |
| C20-22 n6           | 2.84 ± 2.18  | 2.94 ± 3.17  | 1.01 ± 0.18  | 5.17 ± 4.0   |
| C18/20-22 n6        | 3.25 ± 2.02  | 7.13 ± 7.27  | 17.61 ± 3.35 | 5.47 ± 6.32  |
| SFA                 | 28.23 ± 1.24 | 25.89 ± 2.47 | 23.39 ± 0.58 | 25.11 ± 0.35 |

|         |              |              |              |              |
|---------|--------------|--------------|--------------|--------------|
| MUFA    | 60.94 ± 4.57 | 60.60 ± 2.55 | 57.33 ± 0.62 | 51.80 ± 3.52 |
| PUFA    | 10.72 ± 3.37 | 13.39 ± 5.01 | 19.22 ± 0.04 | 22.97 ± 3.13 |
| PUFA n3 | 0.46 ± 0.01  | 0.58 ± 0.22  | 0.73 ± 0.13  | 2.43 ± 2.26  |
| PUFA n6 | 9.88 ± 3.55  | 12.41 ± 4.42 | 18.40 ± 0.10 | 18.27 ± 1.57 |
| n3/n6   | 0.05 ± 0.02  | 0.05 ± 0.01  | 0.04 ± 0.01  | 0.14 ± 0.13  |

SFA= Saturated Fatty Acid, sum of C14:0, C15:0, C15:0iso, C 16:0, C17:0, C17:0 anteiso, C18:0, C18:0 iso, C18:0 anteiso, C20:0, C20:0 iso, C22:0 and C24:0. MUFA = Monounsaturated Fatty Acid, sum of C14:1 cis, C16:1 n7, C18:1 n9, C18:1 n7, C20:1 n9, C22:1. PUFA= Polyunsaturated Fatty Acid, sum of C16:3 n4, C18:3 n6, C18:3 n4, C18:3 n3, C18:4 n3, C20:2 n6, C20:3 n6, C20:4 n6, C22:5 n6, C22:5 n3 and C22:6 n3. PUFA n3 = sum of C18:3n3, 18:4 n3, C20:4 n3, C20:5, C22:5 n3 and C22:6 n3. PUFA n6 = sum of C18:2 n6c, C20:2 n6, C20:4 n6, C22:2 n6, C22:4 n6, C22:5 n6. CD = group of animals treated with control diet supplemented with water; HF= group of animals treated with High Fat Diet supplemented with water; CD + MO = group of animals treated with control diet supplemented with Macadamia Oil; HF + MO = HF= group of animals treated with High Fat Diet supplemented with Macadamia Oil. Values represent the mean and ±SD of the data obtained from analysis of 3 animals per group.
